# Supplementary figures and images for: Exploring the chaotic relationships of Annelida produced by mitogenomic data: skew inversions and their effect on evolutionary studies
Source: Research Square preprint supplement (doi:10.21203/rs.3.rs-1828162/v1), 2022-07-25

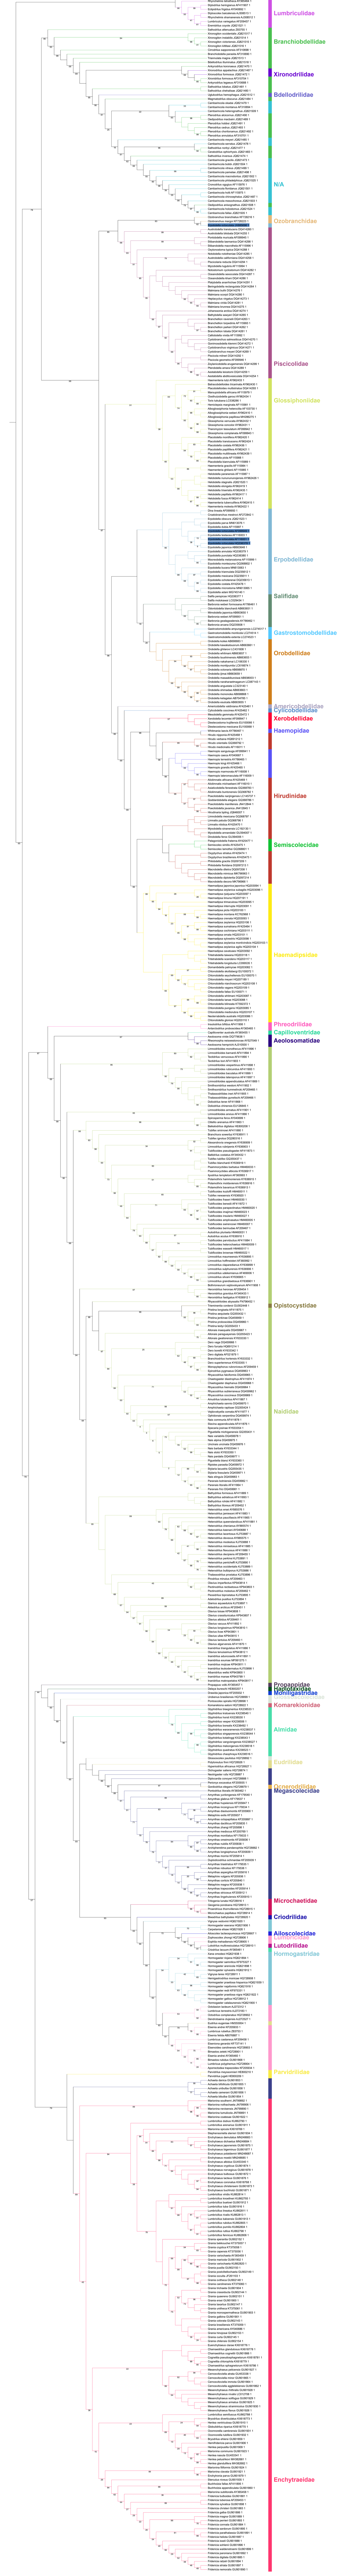

Supplement: Supplementary file 1 [file 3428a752a2c7c0590fecb4ff.pdf]
